# Supplementary material for: ZNF213 negatively controls triple negative breast cancer progression via Hippo/YAP signaling
Source: PubMed Central journal article supplement — Cancer Sci. 2021 May 3;112(7):2714–27. doi: 10.1111/cas.14916 (PMC8253295; doi:10.1111/cas.14916), 2021-05-03

**Figure 1**

**A**

ZNF213

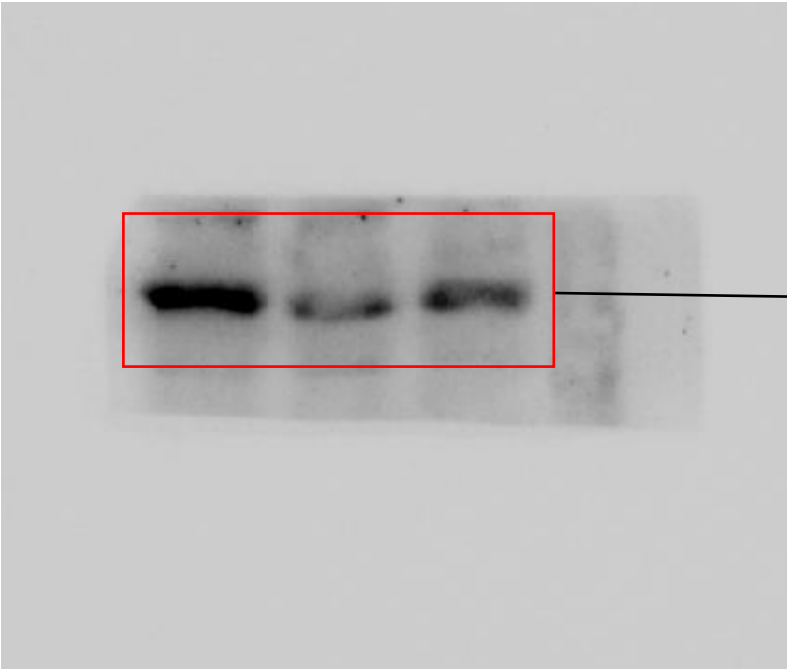

60kD

$\beta$ -actin

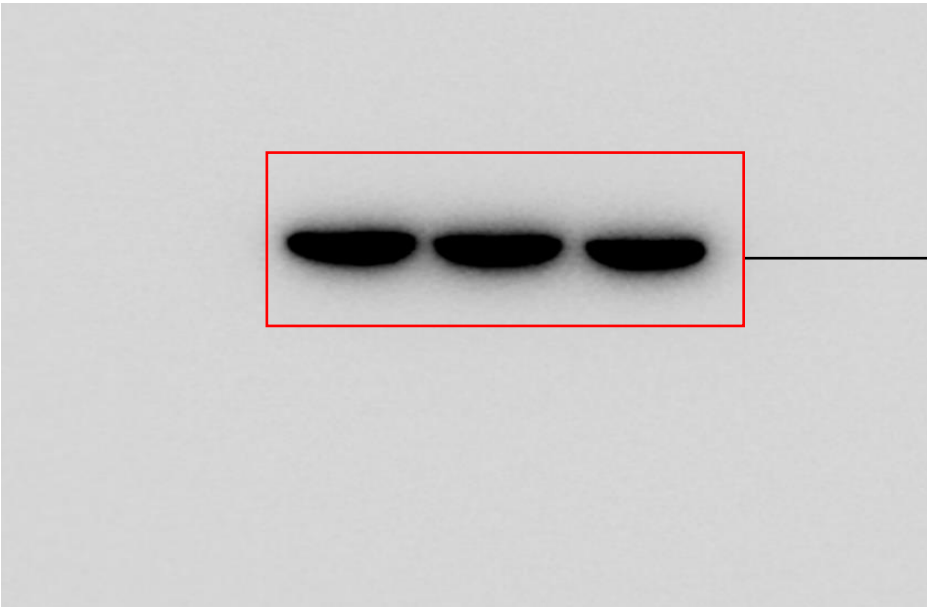

42kD

**Figure 3**

**A** YAP

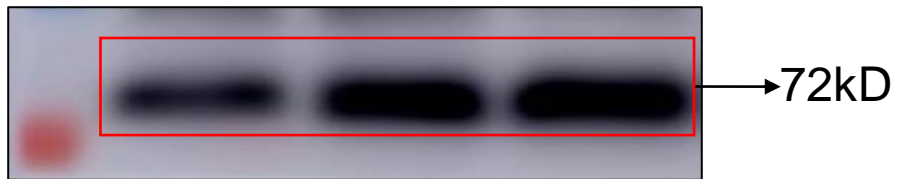

ZNF213

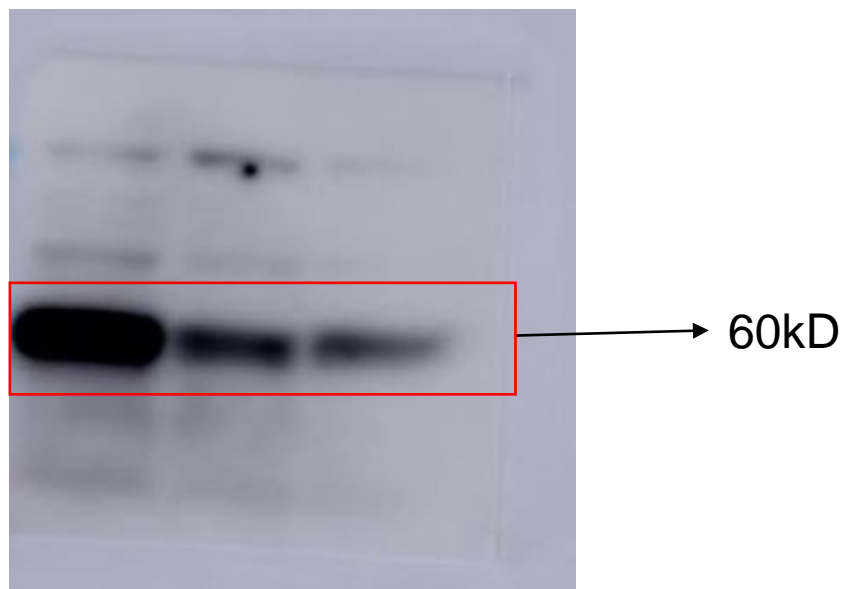

$\beta$ -actin

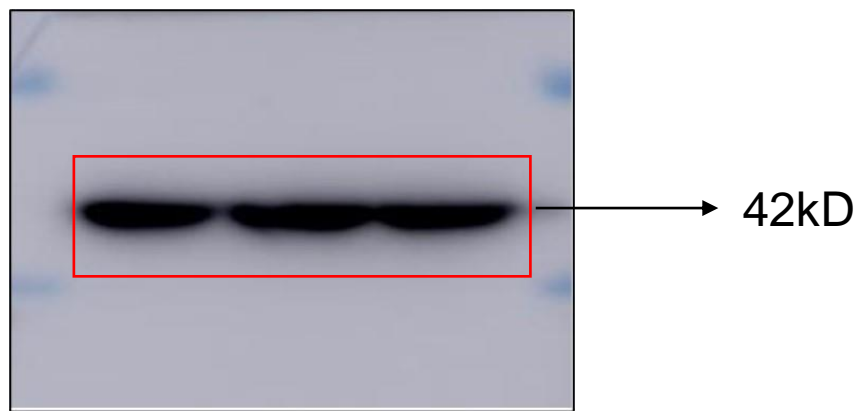

**C**

YAP

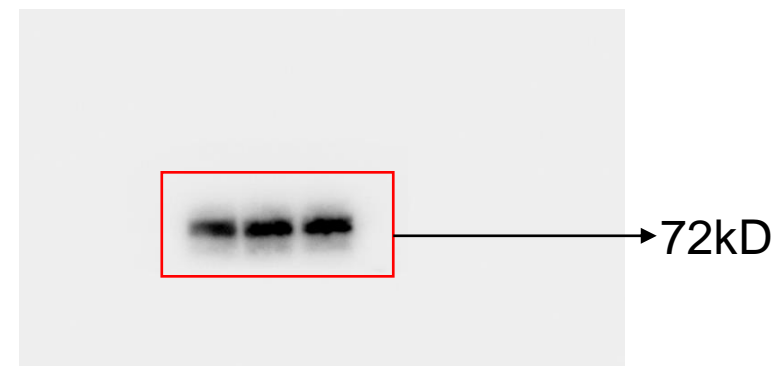

ZNF213

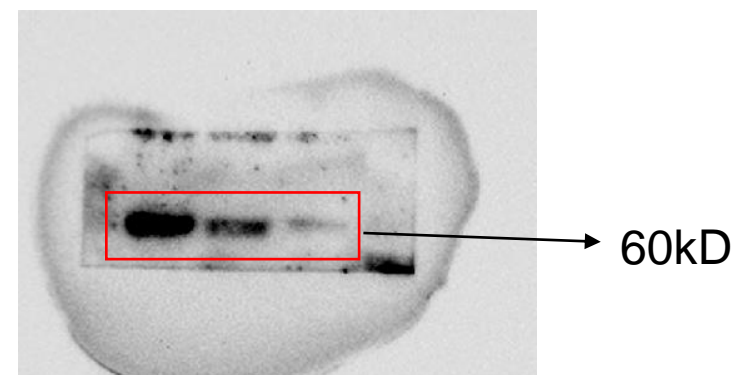

$\beta$ -actin

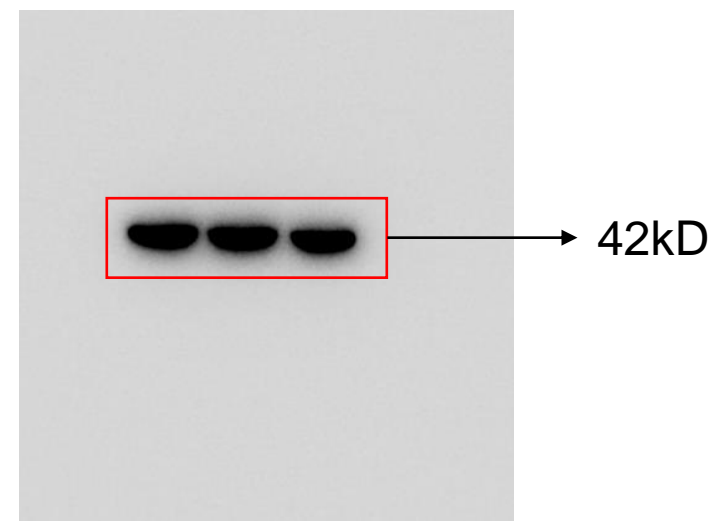

# Figure 3

## F

YAP

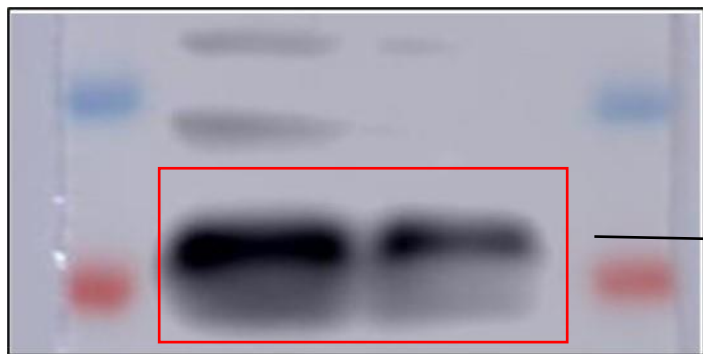

72kD

ZNF213

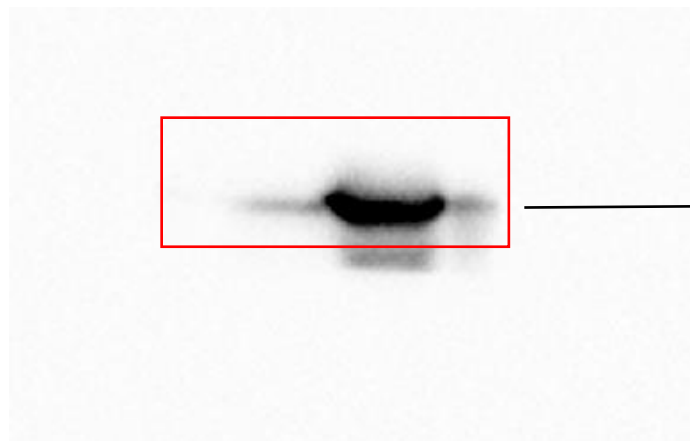

60kD

$\beta$ -actin

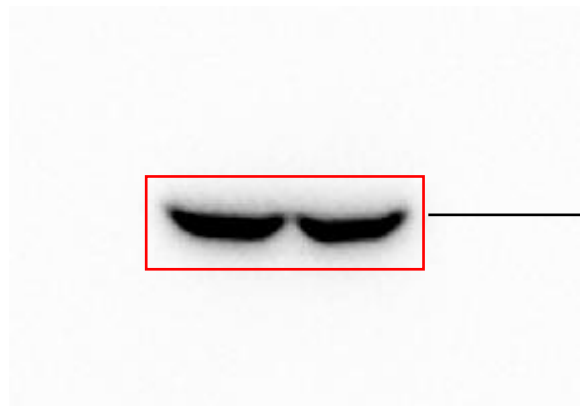

42kD

# Figure 4

**A** ZNF213

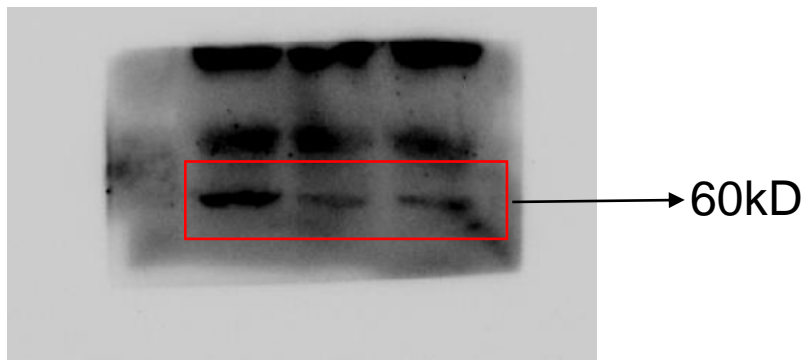

YAP

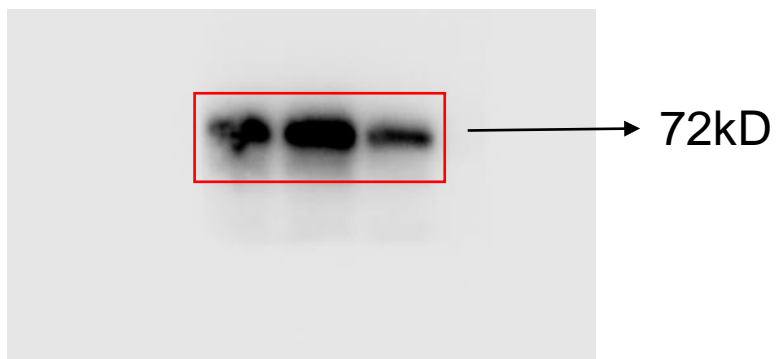

$\beta$ -actin

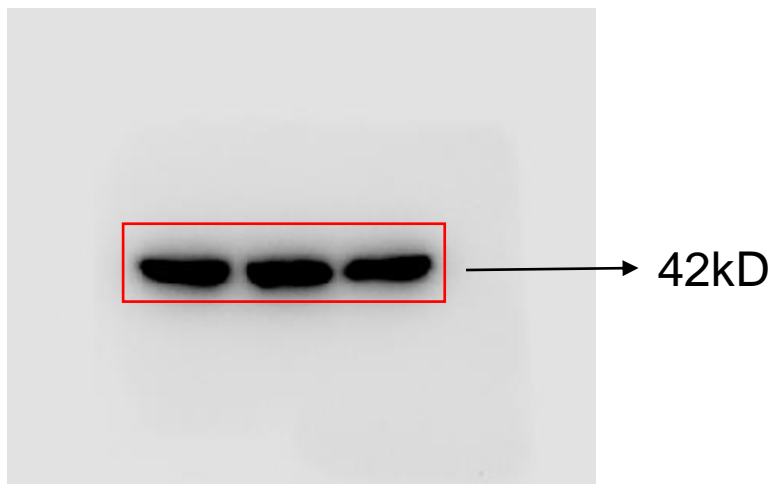

**Figure 6**

**B**

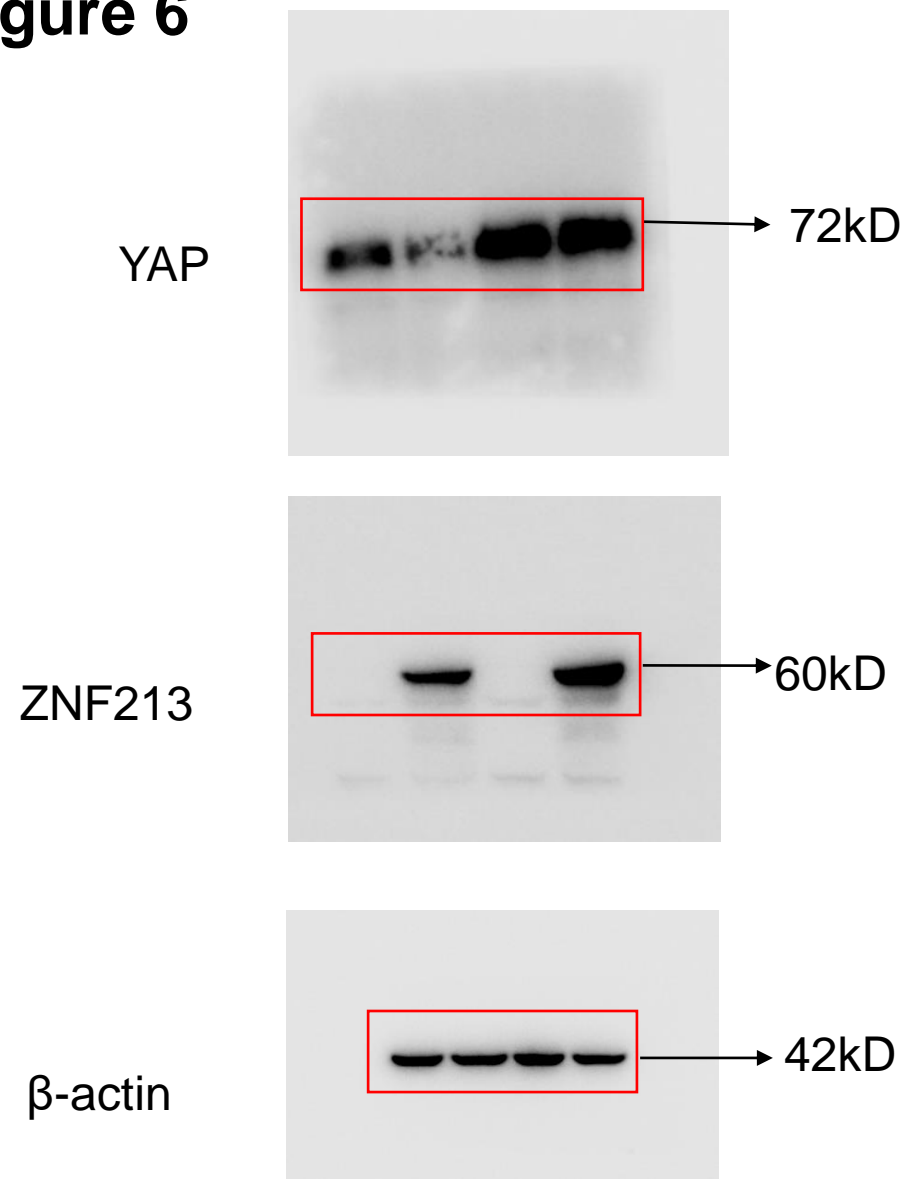

**C**

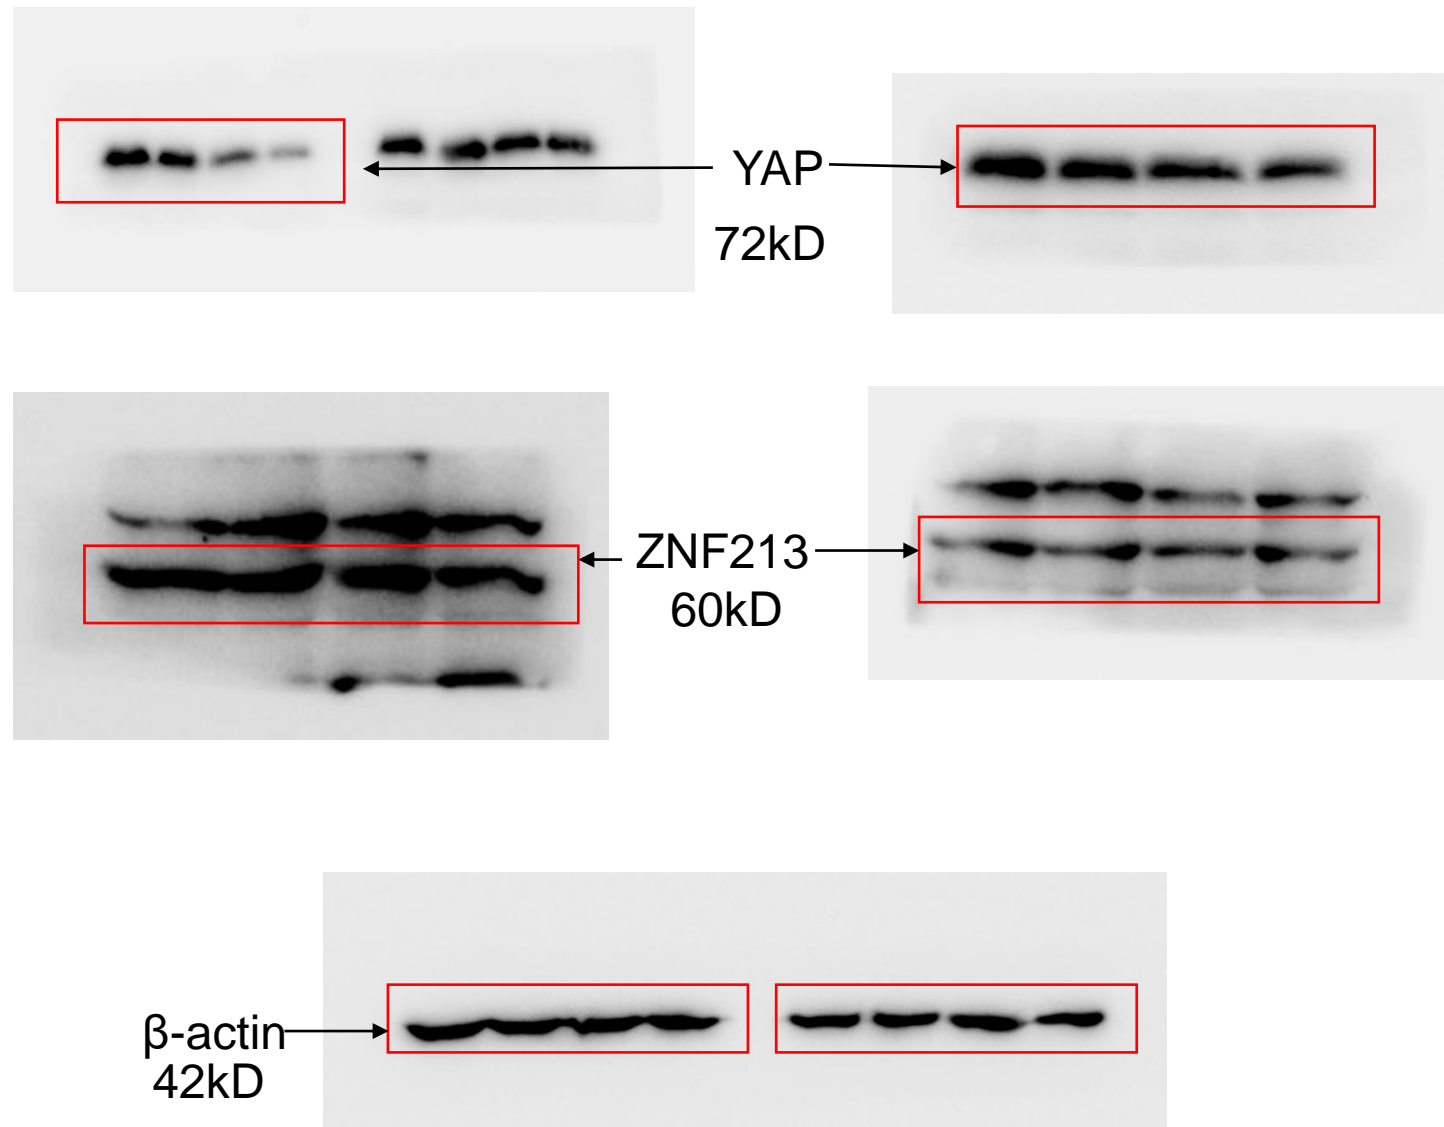

**Figure 6**

**E**

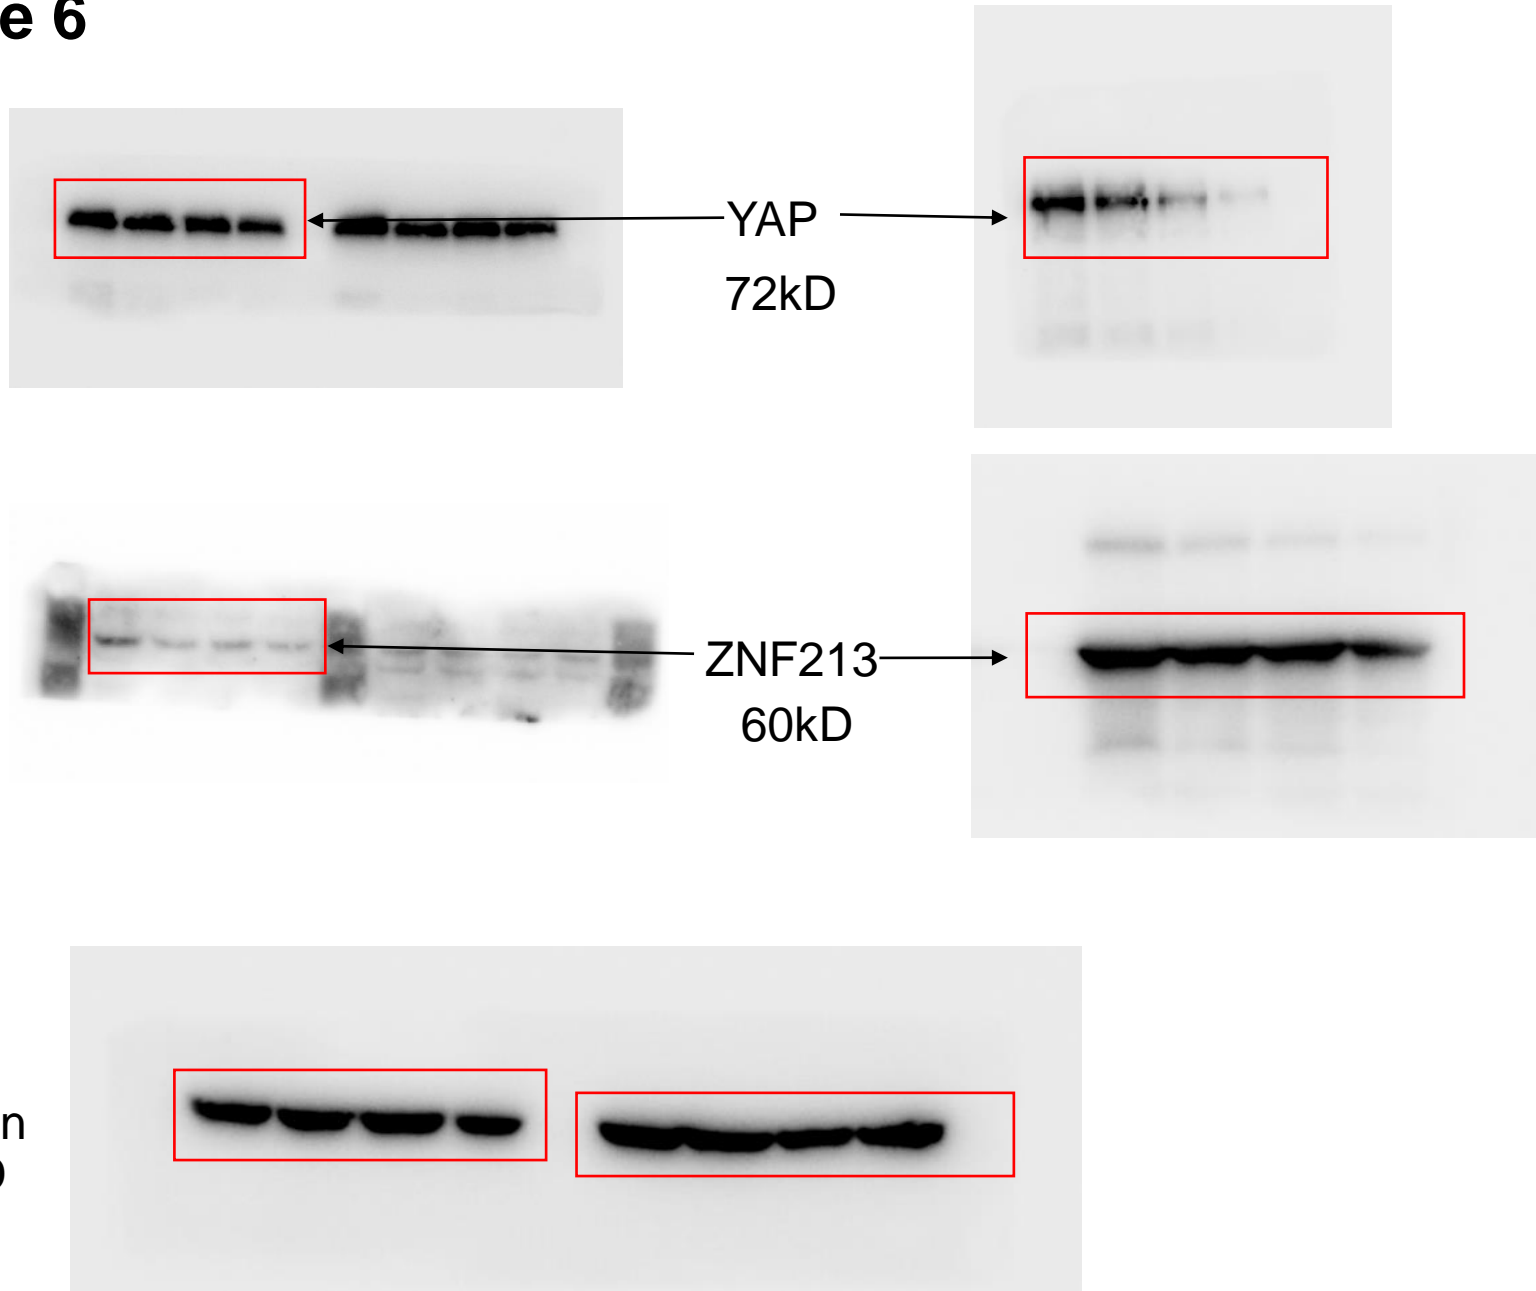

**Figure 7**

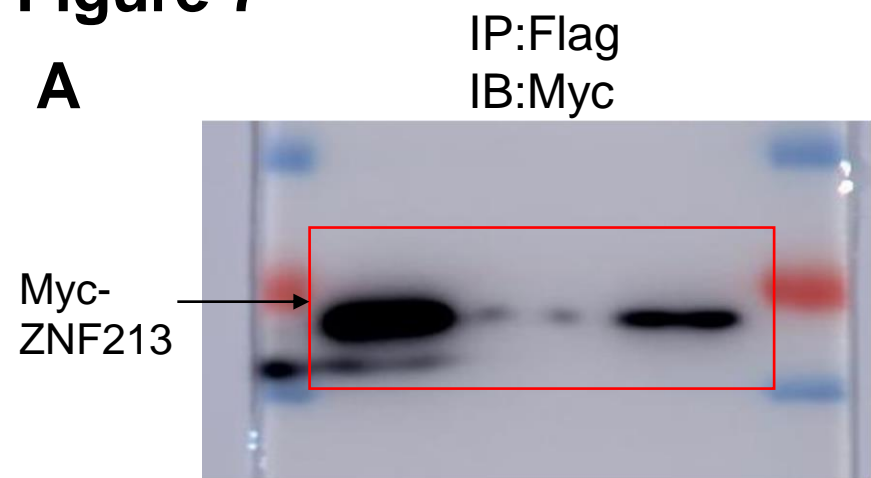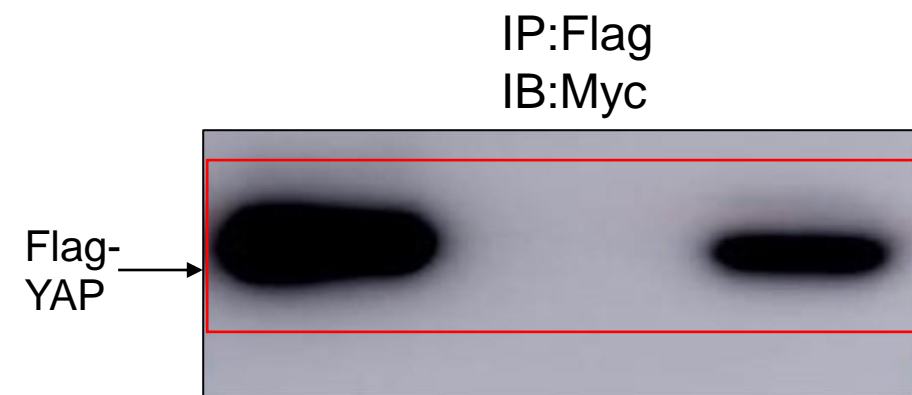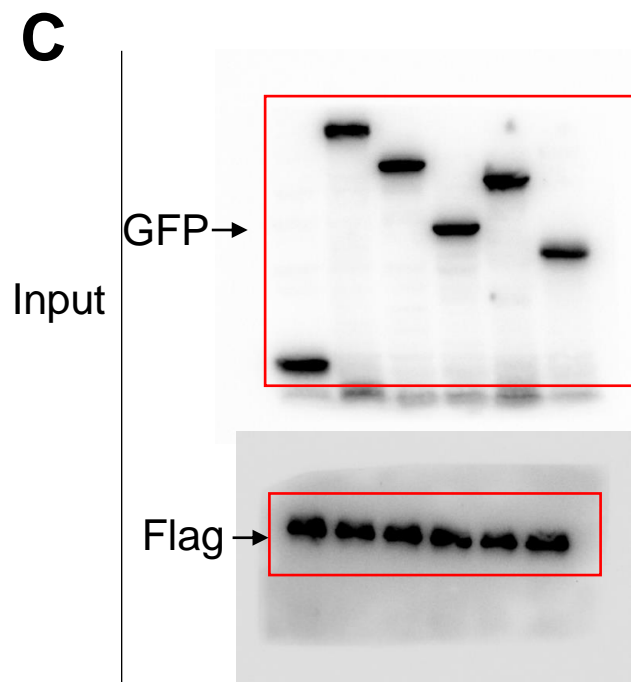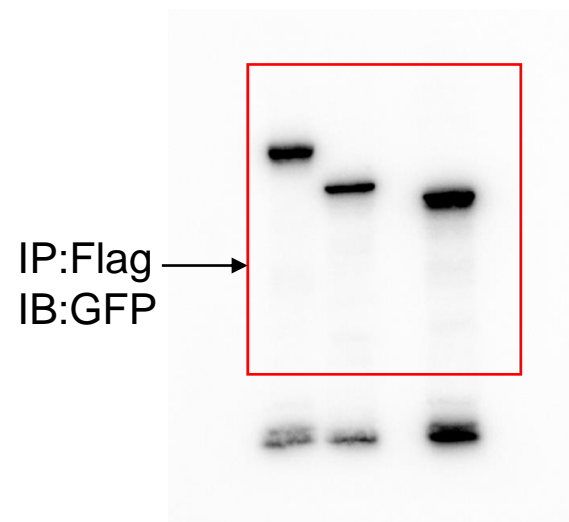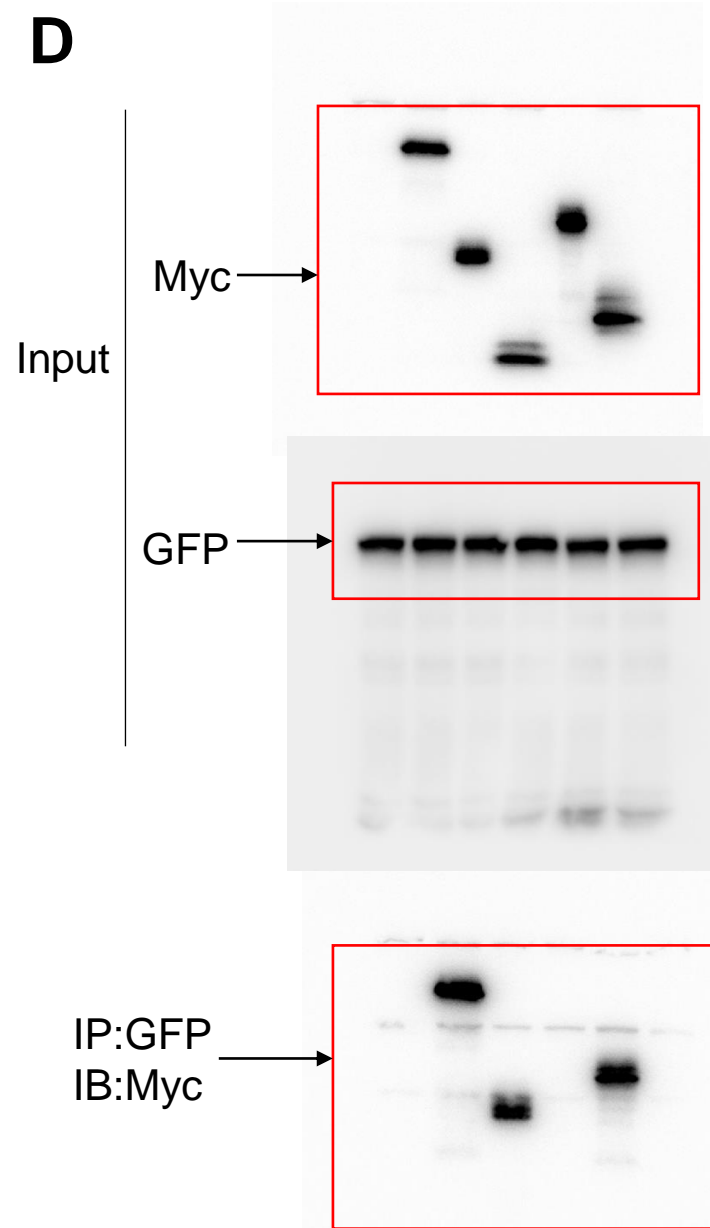

**Figure 8**

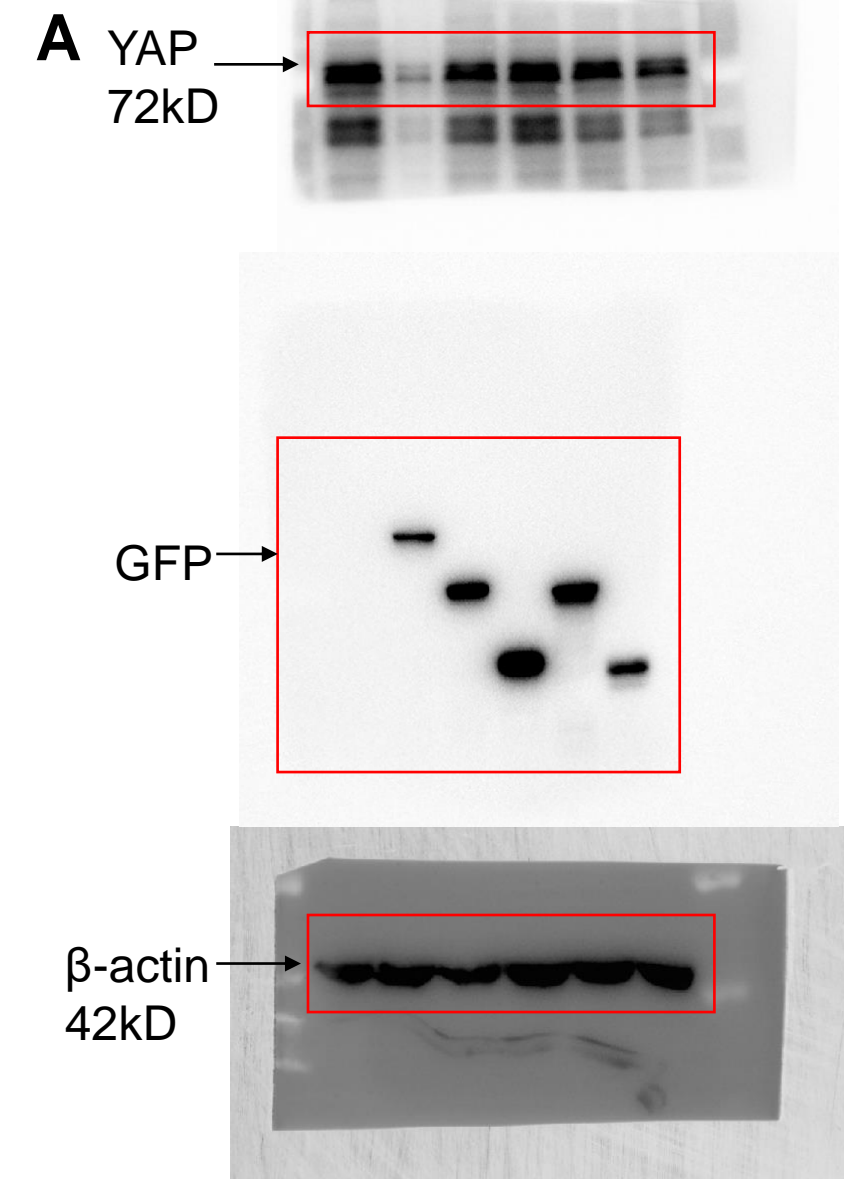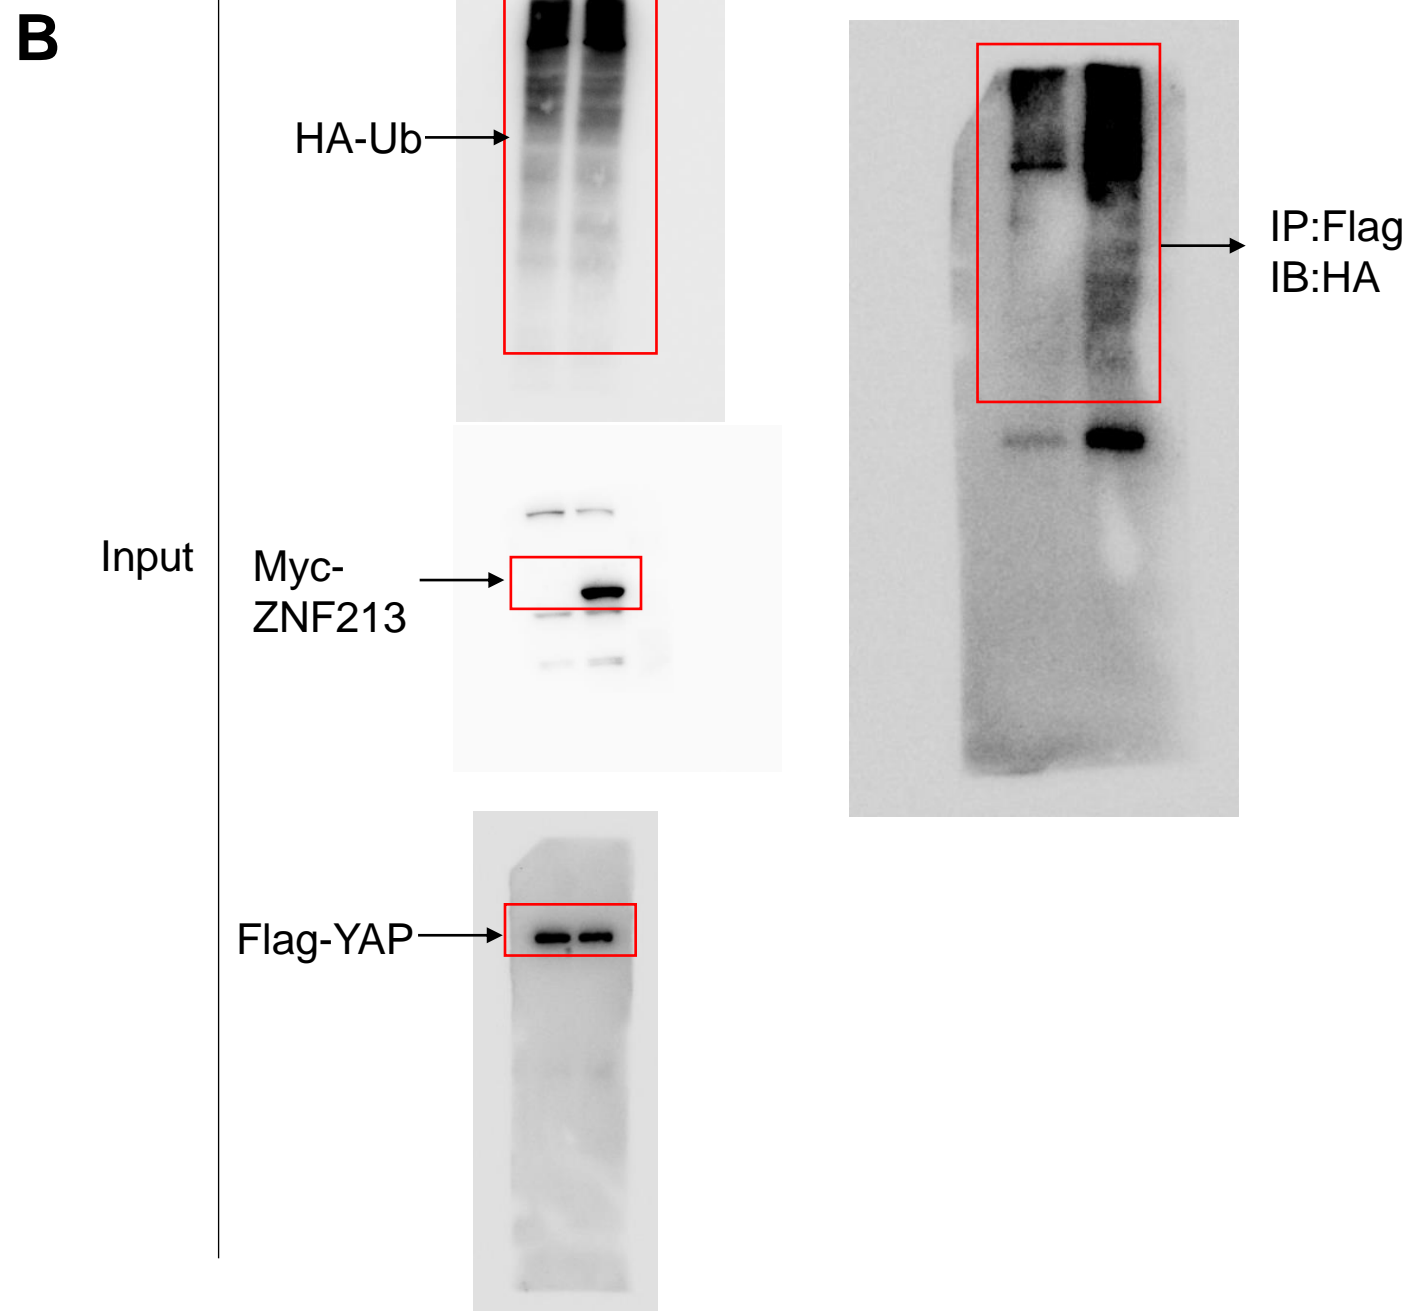



**Figure 8**

**C**

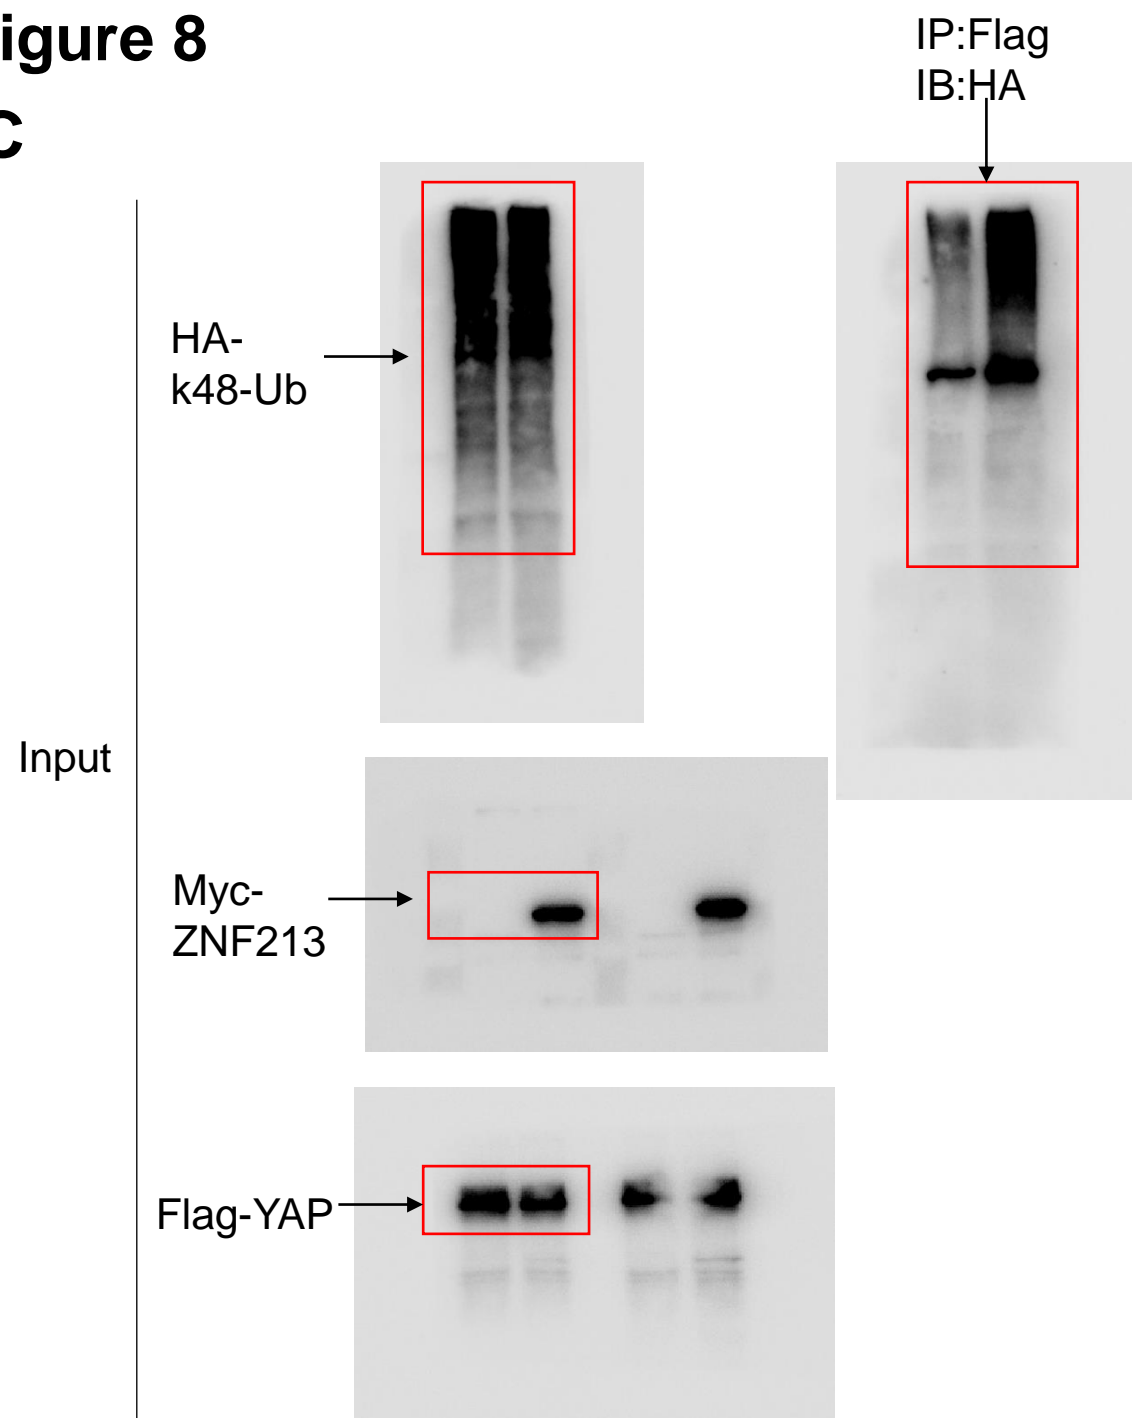

**D**

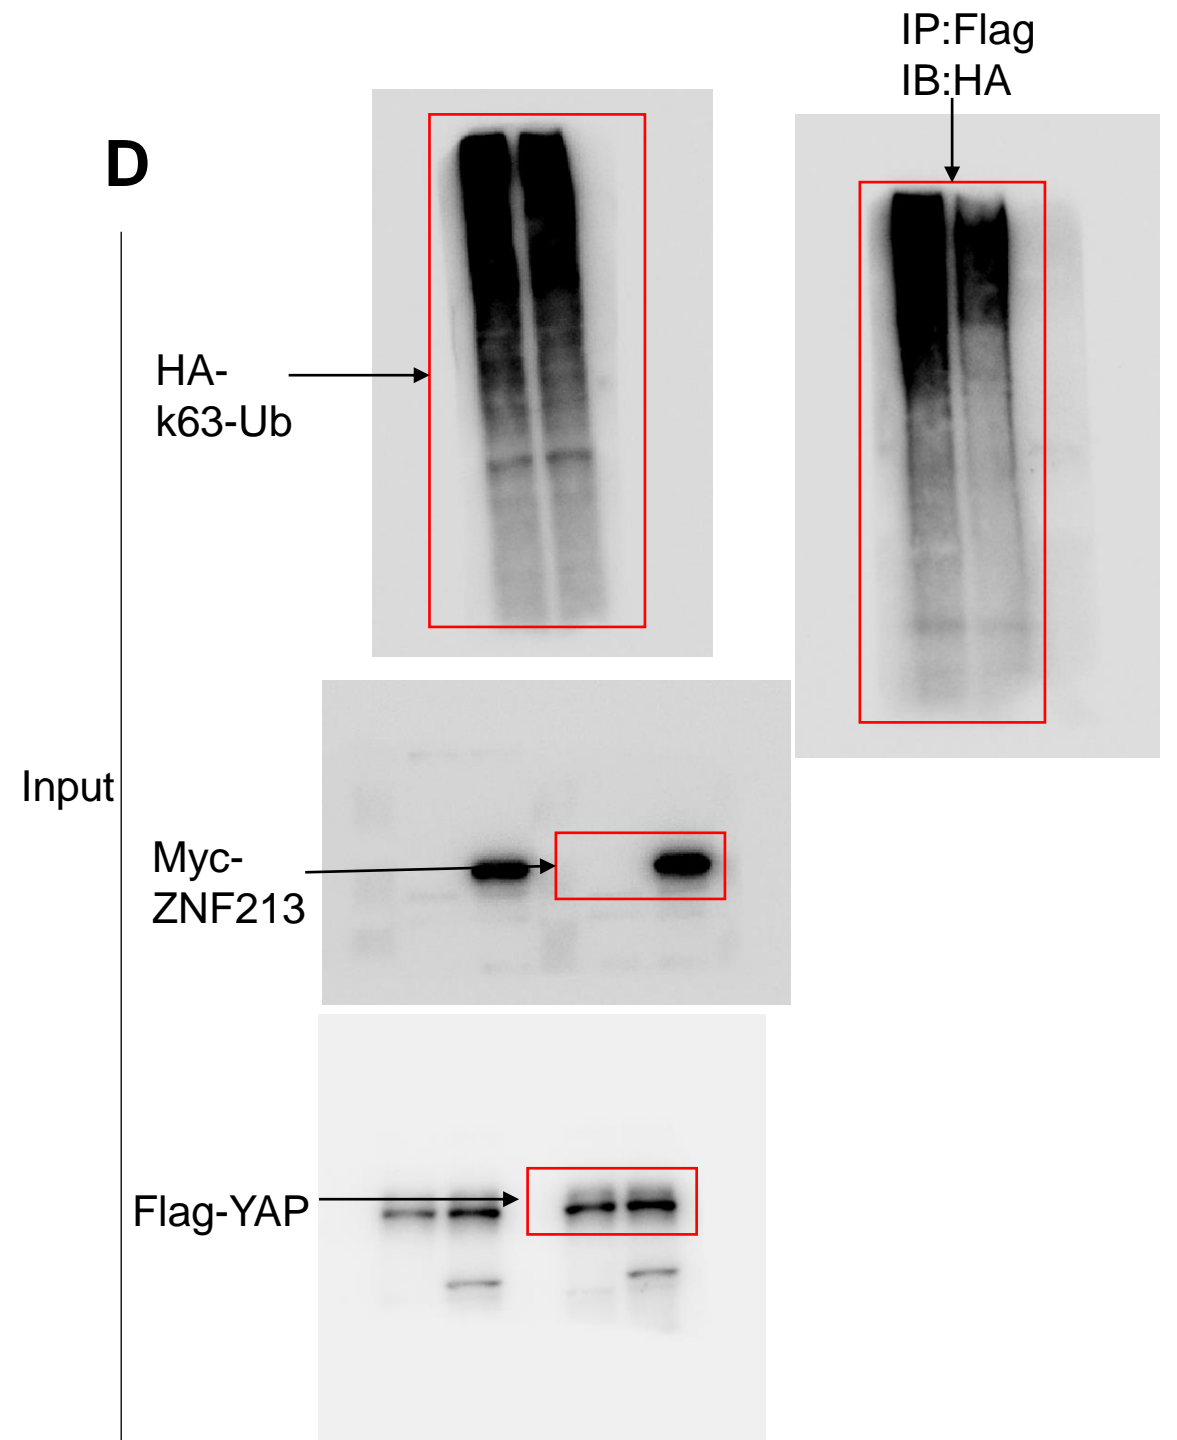

**Figure 9**

**A**

Input

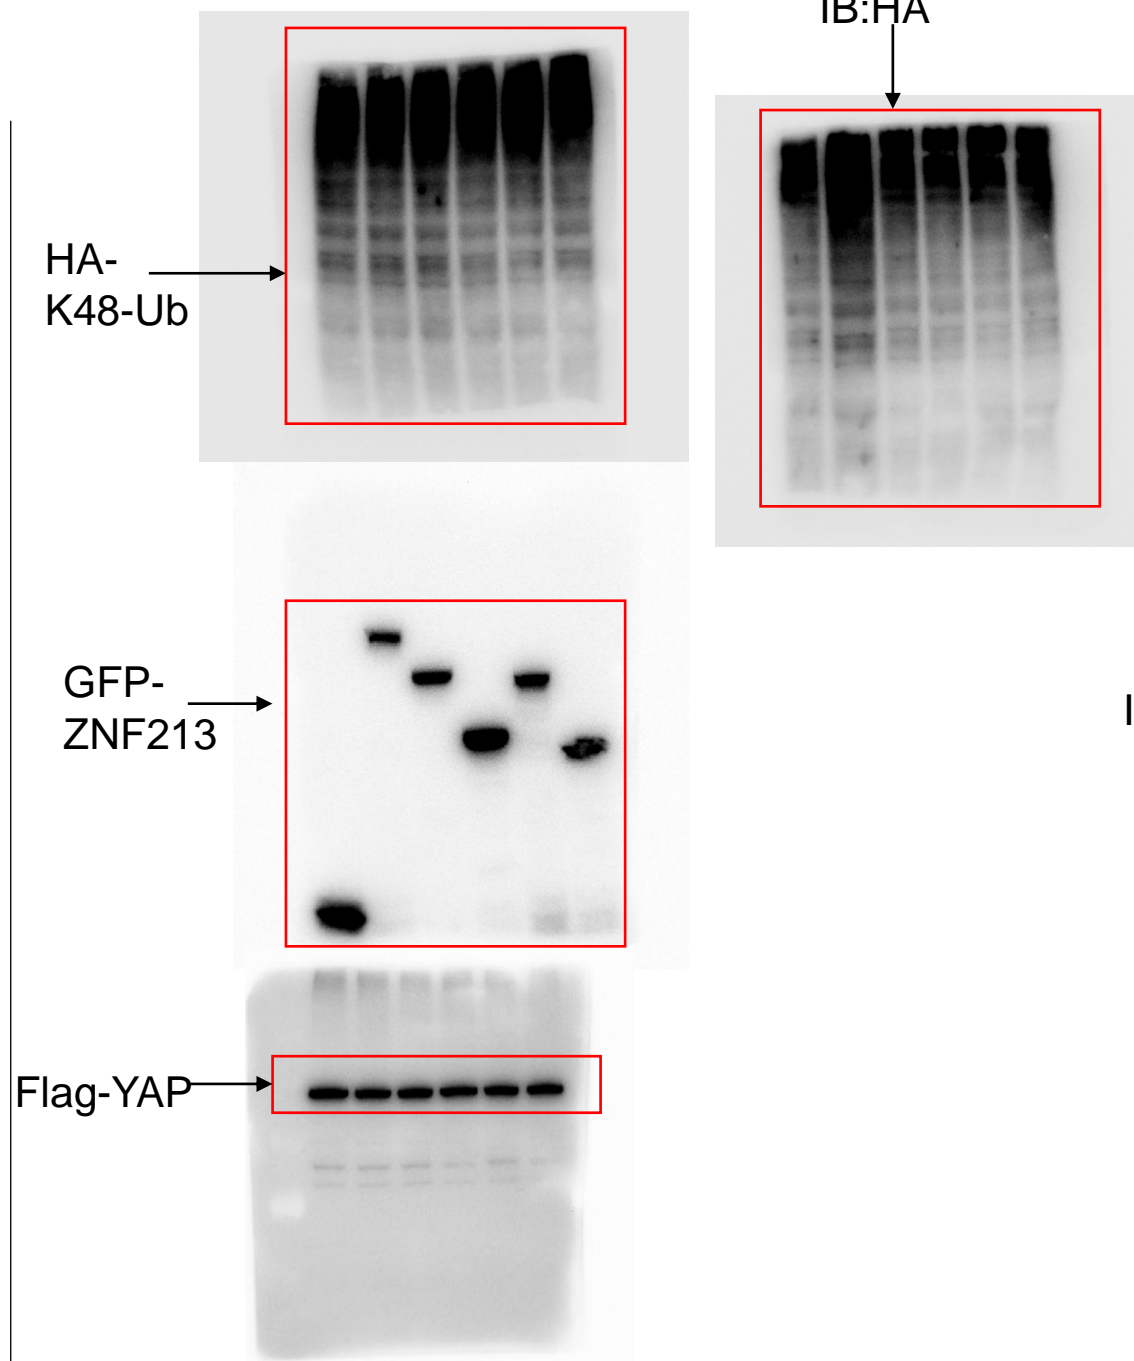

**B**

Input

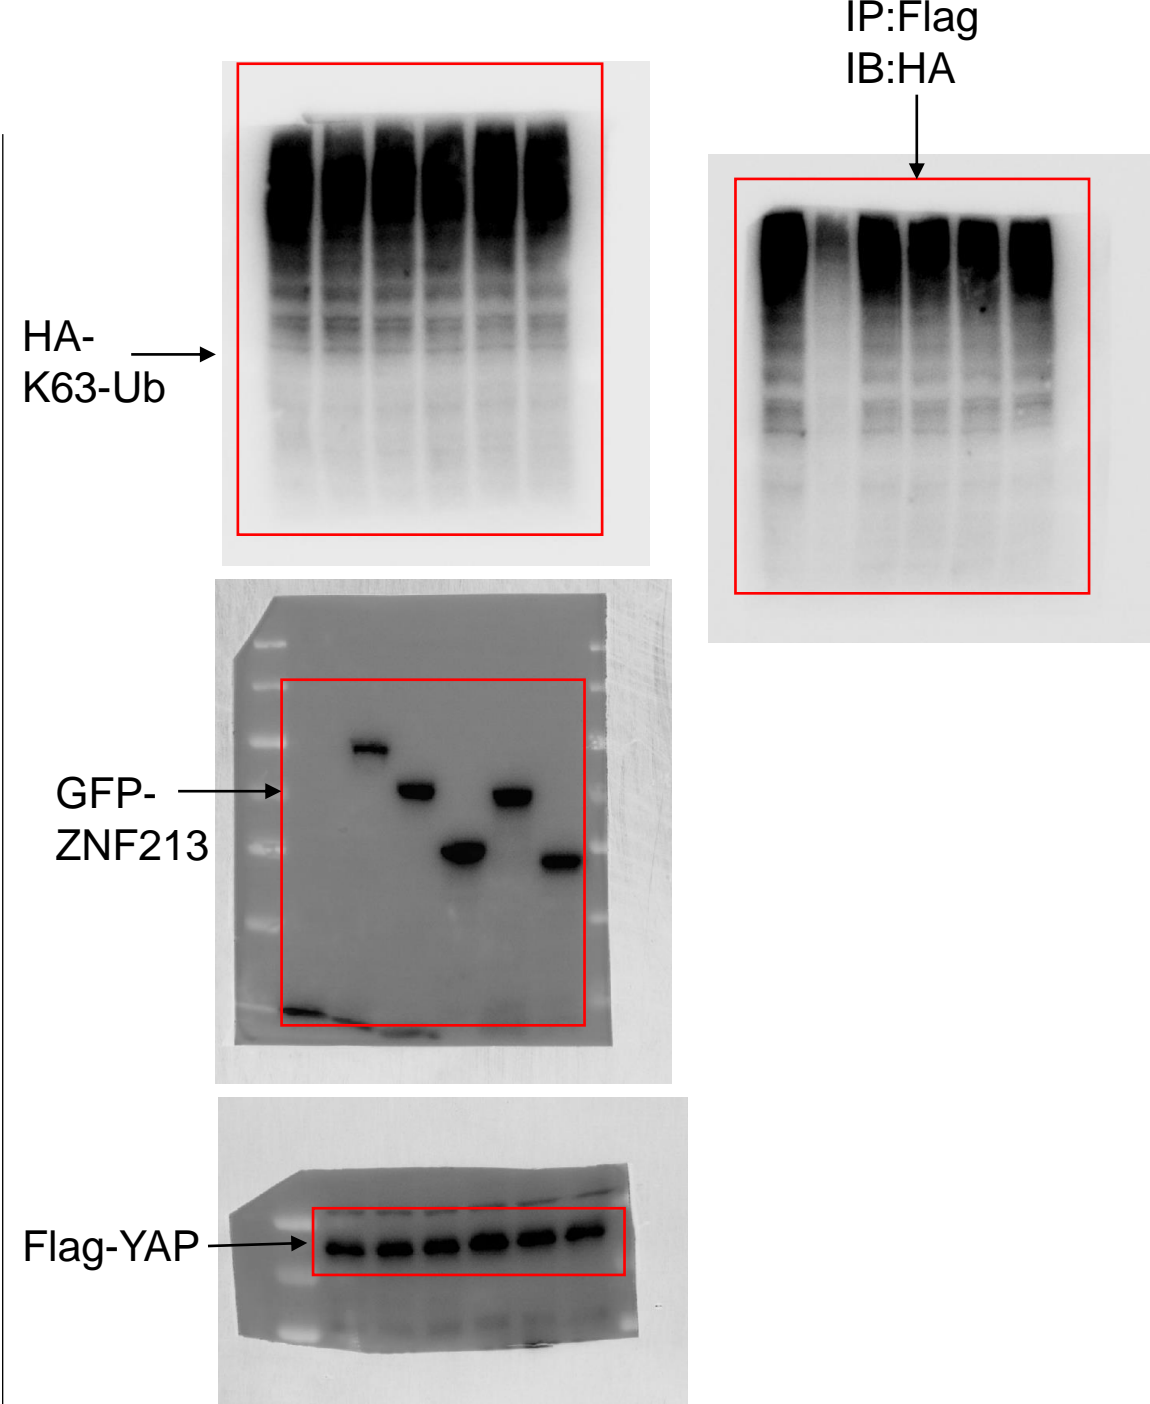

**Figure 9**

**C**

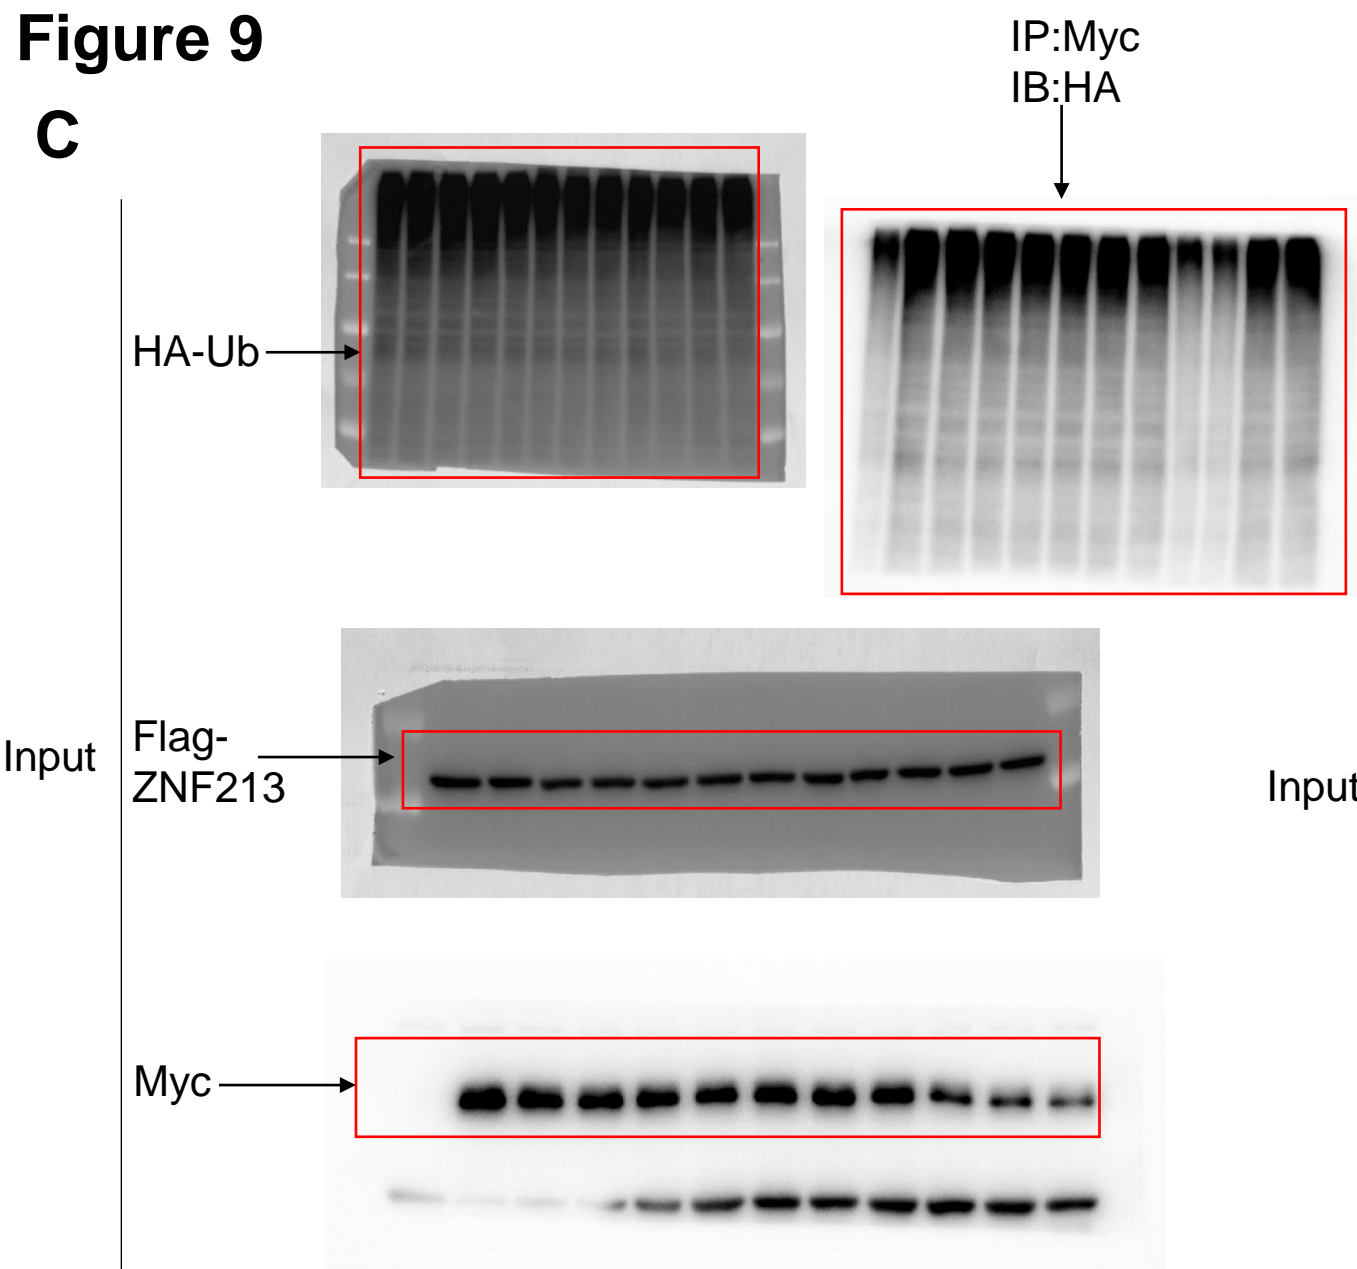

**D**

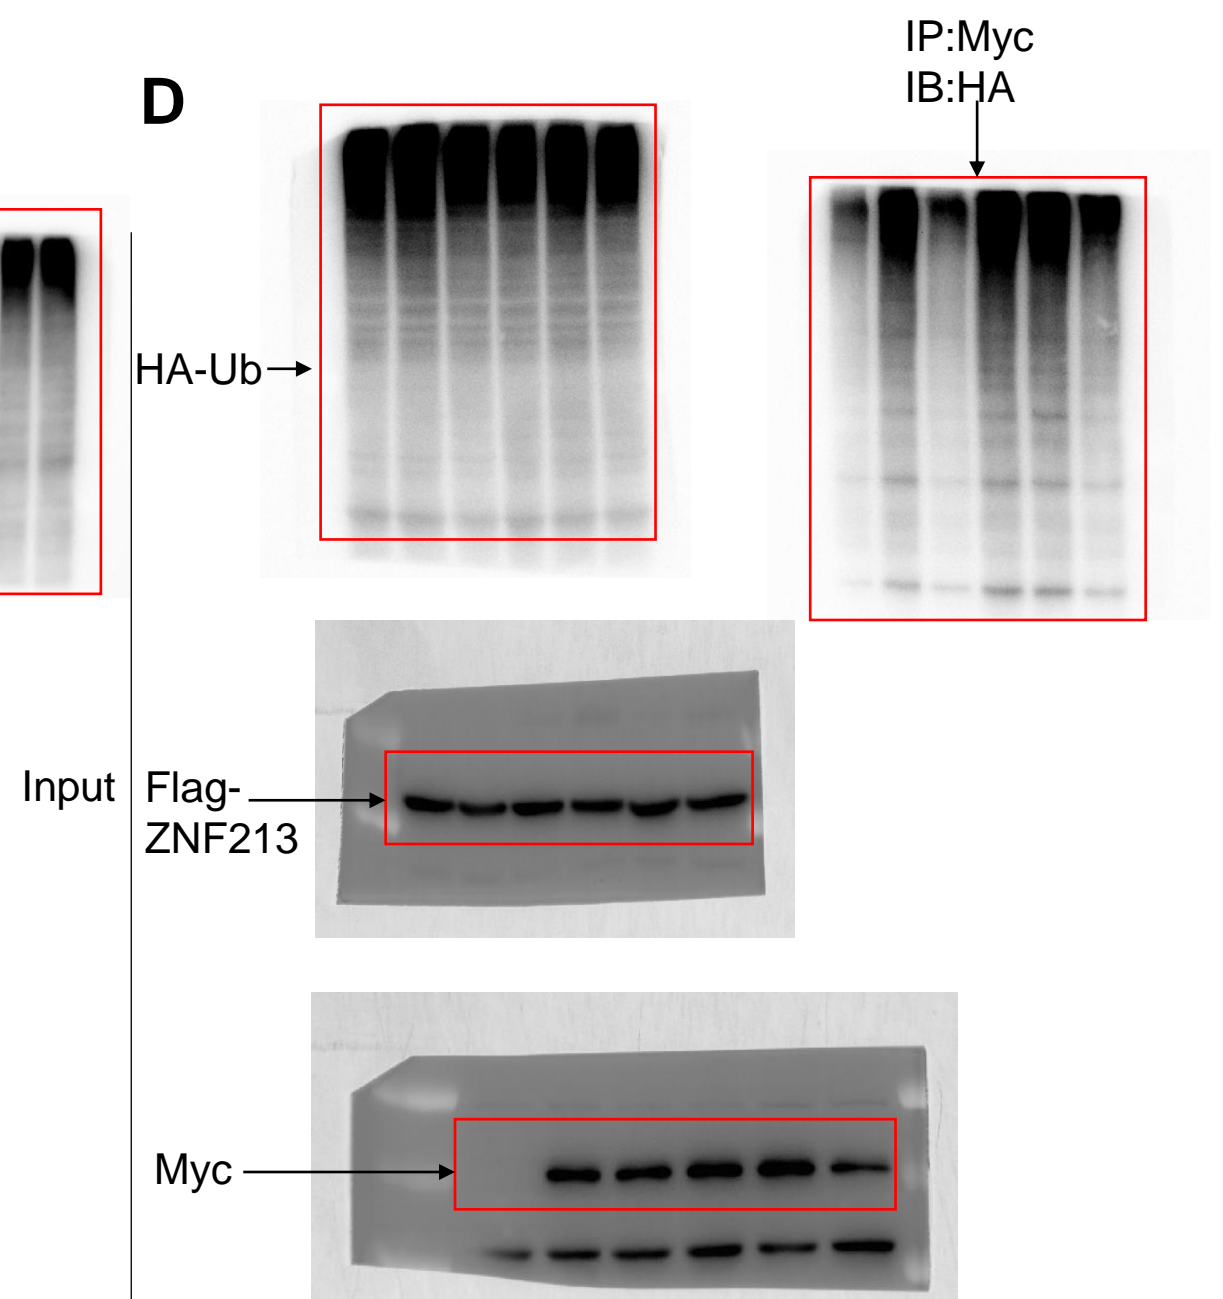

Supplement: CAS-112-2714-s003.pdf [file CAS-112-2714-s003.pdf]
