# Supplementary material for: ZNF213 negatively controls triple negative breast cancer progression via Hippo/YAP signaling
Source: PubMed Central journal article supplement — Cancer Sci. 2021 May 3;112(7):2714–27. doi: 10.1111/cas.14916 (PMC8253295; doi:10.1111/cas.14916), 2021-05-03
Supplement: CAS-112-2714-s001.pdf [file CAS-112-2714-s001.pdf]

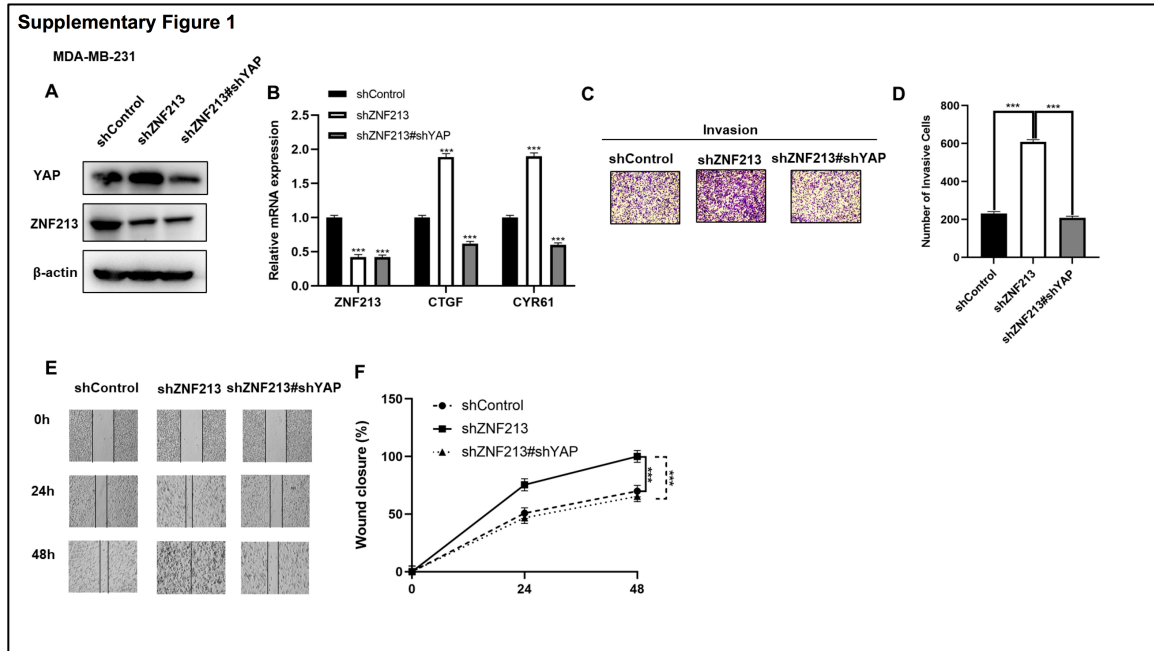

**Supplementary Figure 1. ZNF213 inhibits the migration and invasion of triple negative breast cancer cells through Hippo/YAP signaling.**

**A** ZNF213 depletion increased the level of YAP protein, which can be reversed after YAP knocking-down. ZNF213 and YAP protein levels were determined by western blotting.  $\beta$ -Actin was used as internal reference.

**B** ZNF213 depletion increased the level of Hippo target gene, which can be reversed after YAP knocking-down. ZNF213 and YAP protein levels were determined by western blotting.  $\beta$ -Actin was used as internal reference.

**C-D** ZNF213 depletion increased the invasion capacity of TNBC cells, which can be reversed after YAP knocking-down. The cancer cells were seeded into the chamber for trans-well assay. The cell number was counted and data are showed as  $\pm$  SD. \*\*\* $P < 0.001$  (student's t-test).

**E-F** Wound healing assay demonstrated that ZNF213 depletion increased the migration capacity of TNBC cells, which can be reversed after YAP knocking-down. Quantification of wound closure at the specified time points. Data are showed as  $\pm$  SD. \*\*\* $P < 0.001$  (student's t-test)

**Supplementary Figure 2**

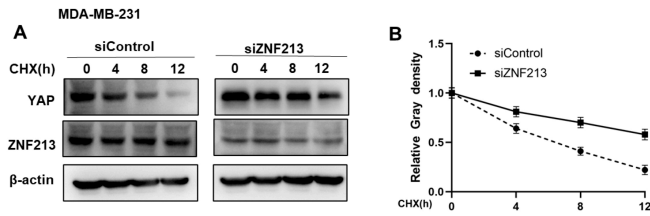

**Supplementary Figure 2. ZNF213 depletion increased the half-life of YAP in MDA-MB-231 cells.**

**A-B** MDA-MB-231 cells were transfected with 50 nM siControl or siZNF213. About 24h later, cells were treated with 100 mM cycloheximide or vehicle for the indicated times. The cell lysates were used for the analysis of western blotting. The results represent three independent experiments. Image J software was used to measure the protein density.

**Supplementary Figure 3**

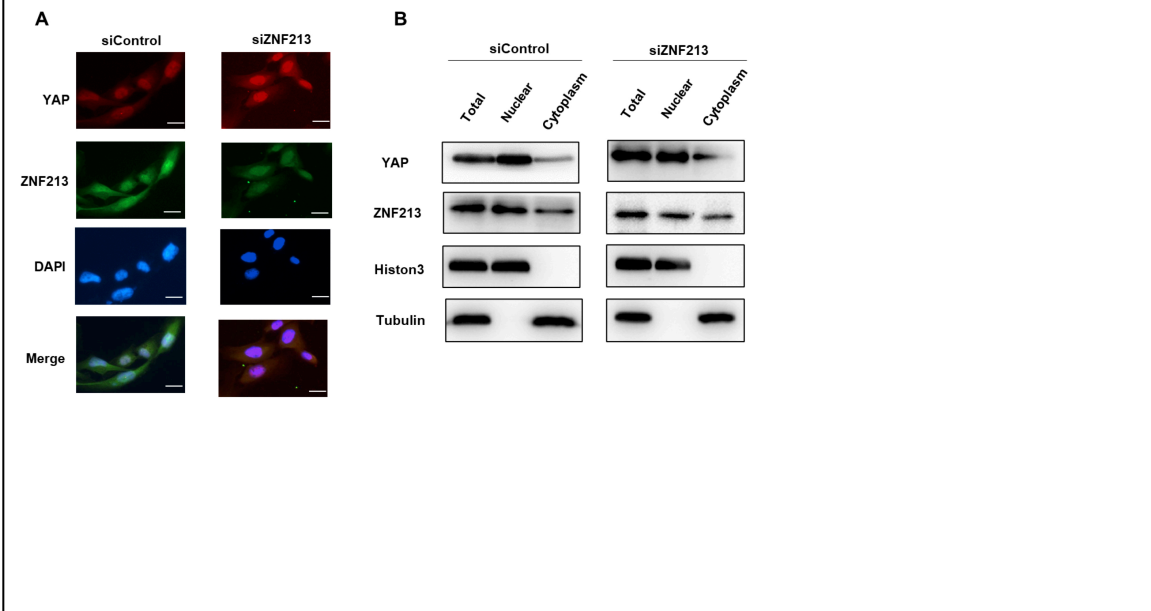

**Supplementary Figure 3. ZNF213 knockdown didn't enhance the nuclear accumulation of YAP.**

**A** Intracellular localization analysis of YAP after ZNF213 knock-down through the immunofluorescence assay. MDA-MB-231 cells were transfected with 50 nM siControl or siZNF213. About 24h later, the cells were fixed. Intracellular localization of YAP (red) and ZNF213 (green) were shown in the pictures. Nuclei (blue) were stained with 40,6-diamidino-2-phenylindole (DAPI). Scale bar, 20  $\mu$ m.

**B** MDA-MB-231 cells were transfected with 50 nM siControl or siZNF213. About 24h later, Nuclear and Cytoplasmic Protein Extraction Kit (Beyotime, P0028) was used for cytoplasm and nuclear separation. Tubulin and Histone-3 were used for cytoplasm and nuclear control. ZNF213 and YAP protein levels were determined by western blotting.
