# Supplementary material for: ZNF213 negatively controls triple negative breast cancer progression via Hippo/YAP signaling
Source: PubMed Central journal article supplement — Cancer Sci. 2021 May 3;112(7):2714–27. doi: 10.1111/cas.14916 (PMC8253295; doi:10.1111/cas.14916), 2021-05-03
Supplement: CAS-112-2714-s002.pdf [file CAS-112-2714-s002.pdf]

## Figure1B

| Well | Sample Name | Target Name | Task  | Reporter | Quencher | CT     |
|------|-------------|-------------|-------|----------|----------|--------|
|      |             | NC          | 36B4  |          |          | 18.589 |
|      |             | NC          | 36B4  |          |          | 18.537 |
|      |             | NC          | 36B4  |          |          | 18.607 |
|      |             | si1         | 36B4  |          |          | 18.335 |
|      |             | si1         | 36B4  |          |          | 18.342 |
|      |             | si1         | 36B4  |          |          | 18.327 |
|      |             | si2         | 36B4  |          |          | 18.163 |
|      |             | si2         | 36B4  |          |          | 18.061 |
|      |             | si2         | 36B4  |          |          | 18.054 |
|      |             |             | ZNF21 |          |          |        |
|      |             | NC          | 3     |          |          | 33.292 |
|      |             |             | ZNF21 |          |          |        |
|      |             | NC          | 3     |          |          | 33.012 |
|      |             |             | ZNF21 |          |          |        |
|      |             | NC          | 3     |          |          | 33.572 |
|      |             |             | ZNF21 |          |          |        |
|      |             | si1         | 3     |          |          | 34.110 |
|      |             |             | ZNF21 |          |          |        |
|      |             | si1         | 3     |          |          | 34.908 |
|      |             |             | ZNF21 |          |          |        |
|      |             | si1         | 3     |          |          | 35.048 |
|      |             |             | ZNF21 |          |          |        |
|      |             | si2         | 3     |          |          | 33.748 |
|      |             |             | ZNF21 |          |          |        |
|      |             | si2         | 3     |          |          | 34.899 |
|      |             |             | ZNF21 |          |          |        |
|      |             | si2         | 3     |          |          | 33.829 |

## Figure3B

| Omit  | Sample Name | Target Name | Task    | Reporter | CT     |
|-------|-------------|-------------|---------|----------|--------|
| FALSE | NC          | 36B4        | UNKNOWN | SYBR     | 17.505 |
| FALSE | NC          | 36B4        | UNKNOWN | SYBR     | 17.398 |
| FALSE | NC          | 36B4        | UNKNOWN | SYBR     | 17.329 |
| FALSE | si1         | 36B4        | UNKNOWN | SYBR     | 17.742 |
| FALSE | si1         | 36B4        | UNKNOWN | SYBR     | 17.859 |
| FALSE | si1         | 36B4        | UNKNOWN | SYBR     | 17.691 |
| FALSE | si2         | 36B4        | UNKNOWN | SYBR     | 17.489 |
| FALSE | si2         | 36B4        | UNKNOWN | SYBR     | 17.526 |

|       |     |        |         |      |        |
|-------|-----|--------|---------|------|--------|
| FALSE | si2 | 36B4   | UNKNOWN | SYBR | 17.390 |
| FALSE | NC  | ZNF213 | UNKNOWN | SYBR | 31.114 |
| FALSE | NC  | ZNF213 | UNKNOWN | SYBR | 30.695 |
| FALSE | NC  | ZNF213 | UNKNOWN | SYBR | 30.142 |
| FALSE | si1 | ZNF213 | UNKNOWN | SYBR | 31.773 |
| FALSE | si1 | ZNF213 | UNKNOWN | SYBR | 32.082 |
| FALSE | si1 | ZNF213 | UNKNOWN | SYBR | 31.574 |
| FALSE | si2 | ZNF213 | UNKNOWN | SYBR | 31.879 |
| FALSE | si2 | ZNF213 | UNKNOWN | SYBR | 31.397 |
| FALSE | si2 | ZNF213 | UNKNOWN | SYBR | 31.381 |
| FALSE | NC  | CTGF   | UNKNOWN | SYBR | 32.646 |
| FALSE | NC  | CTGF   | UNKNOWN | SYBR | 33.905 |
| FALSE | NC  | CTGF   | UNKNOWN | SYBR | 32.376 |
| FALSE | si1 | CTGF   | UNKNOWN | SYBR | 31.780 |
| FALSE | si1 | CTGF   | UNKNOWN | SYBR | 33.958 |
| FALSE | si1 | CTGF   | UNKNOWN | SYBR | 32.728 |
| FALSE | si2 | CTGF   | UNKNOWN | SYBR | 32.066 |
| FALSE | si2 | CTGF   | UNKNOWN | SYBR | 32.225 |
| FALSE | si2 | CTGF   | UNKNOWN | SYBR | 32.534 |
| FALSE | NC  | CYR61  | UNKNOWN | SYBR | 19.854 |
| FALSE | NC  | CYR61  | UNKNOWN | SYBR | 19.868 |
| FALSE | NC  | CYR61  | UNKNOWN | SYBR | 19.882 |
| FALSE | si1 | CYR61  | UNKNOWN | SYBR | 19.309 |
| FALSE | si1 | CYR61  | UNKNOWN | SYBR | 19.664 |
| FALSE | si1 | CYR61  | UNKNOWN | SYBR | 19.684 |
| FALSE | si2 | CYR61  | UNKNOWN | SYBR | 19.108 |
| FALSE | si2 | CYR61  | UNKNOWN | SYBR | 19.248 |
| FALSE | si2 | CYR61  | UNKNOWN | SYBR | 19.156 |

### Figure3D

| Well Position | Sample |      | Target | Task    | Reporter | CT     |
|---------------|--------|------|--------|---------|----------|--------|
|               | Omit   | Name | Name   |         |          |        |
| A1            | FALSE  | NC   | 36b4   | UNKNOWN | SYBR     | 17.958 |
| A2            | FALSE  | NC   | 36b4   | UNKNOWN | SYBR     | 17.926 |
| A3            | FALSE  | NC   | 36b4   | UNKNOWN | SYBR     | 17.815 |
| A4            | FALSE  | si1  | 36b4   | UNKNOWN | SYBR     | 17.926 |
| A5            | FALSE  | si1  | 36b4   | UNKNOWN | SYBR     | 17.805 |
| A6            | FALSE  | si1  | 36b4   | UNKNOWN | SYBR     | 17.867 |
| A7            | FALSE  | si2  | 36b4   | UNKNOWN | SYBR     | 18.039 |
| A8            | FALSE  | si2  | 36b4   | UNKNOWN | SYBR     | 18.031 |
| A9            | FALSE  | si2  | 36b4   | UNKNOWN | SYBR     | 17.936 |
| A10           | FALSE  | NC   | ZNF213 | UNKNOWN | SYBR     | 30.964 |
| A11           | FALSE  | NC   | ZNF213 | UNKNOWN | SYBR     | 29.965 |

|     |       |     |        |         |      |        |
|-----|-------|-----|--------|---------|------|--------|
| A12 | FALSE | NC  | ZNF213 | UNKNOWN | SYBR | 31.364 |
| B1  | FALSE | si1 | ZNF213 | UNKNOWN | SYBR | 31.966 |
| B2  | FALSE | si1 | ZNF213 | UNKNOWN | SYBR | 31.823 |
| B3  | FALSE | si1 | ZNF213 | UNKNOWN | SYBR | 31.250 |
| B4  | FALSE | si2 | ZNF213 | UNKNOWN | SYBR | 32.194 |
| B5  | FALSE | si2 | ZNF213 | UNKNOWN | SYBR | 32.106 |
| B6  | FALSE | si2 | ZNF213 | UNKNOWN | SYBR | 31.780 |
| C1  | FALSE | NC  | CTGF   | UNKNOWN | SYBR | 26.322 |
| C2  | FALSE | NC  | CTGF   | UNKNOWN | SYBR | 27.927 |
| C3  | FALSE | NC  | CTGF   | UNKNOWN | SYBR | 25.642 |
| C4  | FALSE | si1 | CTGF   | UNKNOWN | SYBR | 25.005 |
| C5  | FALSE | si1 | CTGF   | UNKNOWN | SYBR | 24.829 |
| C6  | FALSE | si1 | CTGF   | UNKNOWN | SYBR | 28.451 |
| C7  | FALSE | si2 | CTGF   | UNKNOWN | SYBR | 25.862 |
| C8  | FALSE | si2 | CTGF   | UNKNOWN | SYBR | 25.512 |
| C9  | FALSE | si2 | CTGF   | UNKNOWN | SYBR | 26.033 |
| D1  | FALSE | NC  | CYR61  | UNKNOWN | SYBR | 32.869 |
| D2  | FALSE | NC  | CYR61  | UNKNOWN | SYBR | 32.238 |
| D3  | FALSE | NC  | CYR61  | UNKNOWN | SYBR | 32.361 |
| D4  | FALSE | si1 | CYR61  | UNKNOWN | SYBR | 31.557 |
| D5  | FALSE | si1 | CYR61  | UNKNOWN | SYBR | 31.070 |
| D6  | FALSE | si1 | CYR61  | UNKNOWN | SYBR | 31.488 |
| D7  | FALSE | si2 | CYR61  | UNKNOWN | SYBR | 31.682 |
| D8  | FALSE | si2 | CYR61  | UNKNOWN | SYBR | 31.928 |
| D9  | FALSE | si2 | CYR61  | UNKNOWN | SYBR | 31.713 |

### Figure3G

| Well     | Sample | Target     | Task | Reporter | CT   |        |
|----------|--------|------------|------|----------|------|--------|
| Position | Omit   | Name       | Name |          |      |        |
| A1       | FALSE  | Myc-tag    | 36B4 | UNKNOWN  | SYBR | 16.646 |
| A2       | FALSE  | Myc-tag    | 36B4 | UNKNOWN  | SYBR | 16.650 |
| A3       | FALSE  | Myc-tag    | 36B4 | UNKNOWN  | SYBR | 16.686 |
| A4       | FALSE  | Myc-ZNF213 | 36B4 | UNKNOWN  | SYBR | 16.197 |
| A5       | FALSE  | Myc-ZNF213 | 36B4 | UNKNOWN  | SYBR | 16.256 |
| A6       | FALSE  | Myc-ZNF213 | 36B4 | UNKNOWN  | SYBR | 16.254 |
| A7       | FALSE  | Myc-tag    | CTGF | UNKNOWN  | SYBR | 27.393 |
| A8       | FALSE  | Myc-tag    | CTGF | UNKNOWN  | SYBR | 27.242 |
| A9       | FALSE  | Myc-tag    | CTGF | UNKNOWN  | SYBR | 27.165 |

|     |       |                |       |         |      |        |
|-----|-------|----------------|-------|---------|------|--------|
| A10 | FALSE | Myc-<br>ZNF213 | CTGF  | UNKNOWN | SYBR | 28.425 |
| A11 | FALSE | Myc-<br>ZNF213 | CTGF  | UNKNOWN | SYBR | 27.609 |
| A12 | FALSE | Myc-<br>ZNF213 | CTGF  | UNKNOWN | SYBR | 28.076 |
| B1  | FALSE | Myc-tag        | CYR61 | UNKNOWN | SYBR | 23.819 |
| B2  | FALSE | Myc-tag        | CYR61 | UNKNOWN | SYBR | 24.077 |
| B3  | FALSE | Myc-tag        | CYR61 | UNKNOWN | SYBR | 23.710 |
| B4  | FALSE | Myc-<br>ZNF213 | CYR61 | UNKNOWN | SYBR | 24.020 |
| B5  | FALSE | Myc-<br>ZNF213 | CYR61 | UNKNOWN | SYBR | 24.351 |
| B6  | FALSE | Myc-<br>ZNF213 | CYR61 | UNKNOWN | SYBR | 24.810 |

## Figure4B

| Well     |       |                | Target |         |          |          |
|----------|-------|----------------|--------|---------|----------|----------|
| Position | Omit  | Sample Name    | Name   | Task    | Reporter | CT       |
| A1       | FALSE | siControl      | 36B4   | UNKNOWN | SYBR     | 16.793   |
| A2       | FALSE | siControl      | 36B4   | UNKNOWN | SYBR     | 16.828   |
| A3       | FALSE | siControl      | 36B4   | UNKNOWN | SYBR     | 16.817   |
| A4       | FALSE | siZNF213       | 36B4   | UNKNOWN | SYBR     | 16.904   |
| A5       | FALSE | siZNF213       | 36B4   | UNKNOWN | SYBR     | 16.856   |
| A6       | FALSE | siZNF213       | 36B4   | UNKNOWN | SYBR     | 16.911   |
| A7       | FALSE | siZNF213#siYAP | 36B4   | UNKNOWN | SYBR     | 16.857   |
| A8       | FALSE | siZNF213#siYAP | 36B4   | UNKNOWN | SYBR     | 16.966   |
| A9       | FALSE | siZNF213#siYAP | 36B4   | UNKNOWN | SYBR     | 16.840   |
| B1       | FALSE | siControl      | ZNF213 | UNKNOWN | SYBR     | 29.35531 |
| B2       | FALSE | siControl      | ZNF213 | UNKNOWN | SYBR     | 30.62782 |
| B3       | FALSE | siControl      | ZNF213 | UNKNOWN | SYBR     | 30.35723 |
| B4       | FALSE | siZNF213       | ZNF213 | UNKNOWN | SYBR     | 31.76578 |
| B5       | FALSE | siZNF213       | ZNF213 | UNKNOWN | SYBR     | 31.08898 |
| B6       | FALSE | siZNF213       | ZNF213 | UNKNOWN | SYBR     | 30.75033 |
| B7       | FALSE | siZNF213#siYAP | ZNF213 | UNKNOWN | SYBR     | 30.97437 |
| B8       | FALSE | siZNF213#siYAP | ZNF213 | UNKNOWN | SYBR     | 31.04004 |
| B9       | FALSE | siZNF213#siYAP | ZNF213 | UNKNOWN | SYBR     | 31.17224 |
| C1       | FALSE | siControl      | CTGF   | UNKNOWN | SYBR     | 23.667   |
| C2       | FALSE | siControl      | CTGF   | UNKNOWN | SYBR     | 22.513   |
| C3       | FALSE | siControl      | CTGF   | UNKNOWN | SYBR     | 22.404   |
| C4       | FALSE | siZNF213       | CTGF   | UNKNOWN | SYBR     | 22.668   |
| C5       | FALSE | siZNF213       | CTGF   | UNKNOWN | SYBR     | 21.680   |
| C6       | FALSE | siZNF213       | CTGF   | UNKNOWN | SYBR     | 21.945   |

|    |       |                |       |         |      |        |
|----|-------|----------------|-------|---------|------|--------|
| C7 | FALSE | siZNF213#siYAP | CTGF  | UNKNOWN | SYBR | 23.291 |
| C8 | FALSE | siZNF213#siYAP | CTGF  | UNKNOWN | SYBR | 23.492 |
| C9 | FALSE | siZNF213#siYAP | CTGF  | UNKNOWN | SYBR | 23.606 |
| D1 | FALSE | siControl      | CYR61 | UNKNOWN | SYBR | 29.635 |
| D2 | FALSE | siControl      | CYR61 | UNKNOWN | SYBR | 30.205 |
| D3 | FALSE | siControl      | CYR61 | UNKNOWN | SYBR | 30.100 |
| D4 | FALSE | siZNF213       | CYR61 | UNKNOWN | SYBR | 28.813 |
| D5 | FALSE | siZNF213       | CYR61 | UNKNOWN | SYBR | 28.978 |
| D6 | FALSE | siZNF213       | CYR61 | UNKNOWN | SYBR | 29.683 |
| D7 | FALSE | siZNF213#siYAP | CYR61 | UNKNOWN | SYBR | 30.509 |
| D8 | FALSE | siZNF213#siYAP | CYR61 | UNKNOWN | SYBR | 30.638 |
| D9 | FALSE | siZNF213#siYAP | CYR61 | UNKNOWN | SYBR | 31.292 |
